# Supplementary material for: Do Tree Size and Tree Shade Tolerance Affect the Photosynthetic Capacity of Broad-Leaved Tree Species?
Source: MDPI journal article supplement (doi:10.3390/plants12030523), 2023-01-23
Supplement: s1 [file s1]

**Table S1** Basic information table for leaf traits

| Leaf traits    | Mean value | Minimum<br>value | Maximum value |
|----------------|------------|------------------|---------------|
| P <sub>n</sub> | 0.19       | 0.07             | 0.49          |
| ET             | 26.93      | 16.81            | 40.62         |
| PT             | 49.44      | 25.58            | 103.93        |
| ST             | 50.09      | 18.94            | 84.16         |
| PT/ST          | 1.04       | 0.49             | 2.40          |
| PT/LT          | 0.39       | 0.24             | 0.56          |
| ST/LT          | 0.39       | 0.22             | 0.53          |
| C              | 429.57     | 352.10           | 493.20        |
| N              | 19.96      | 13.25            | 34.65         |
| PNUE           | 0.0095     | 0.0032           | 0.0227        |
| P              | 2.04       | 1.28             | 4.01          |
| PPUE           | 0.0921     | 0.0403           | 0.2225        |
| SLA            | 0.0250     | 0.0120           | 0.0471        |
| G <sub>s</sub> | 0.0043     | <b>0.0008</b>    | 0.0261        |

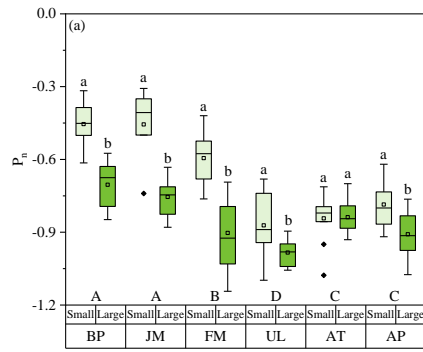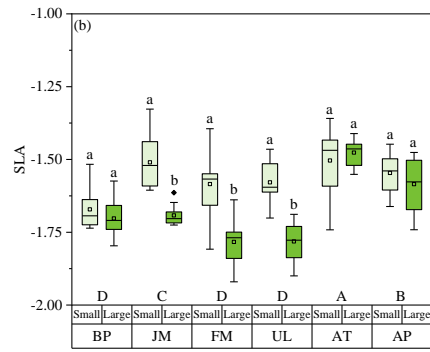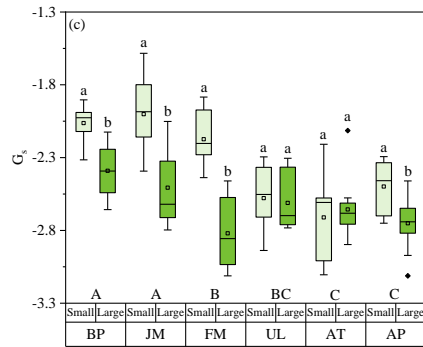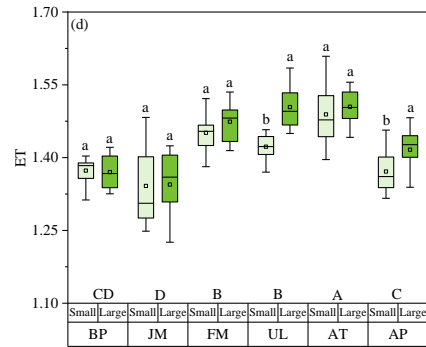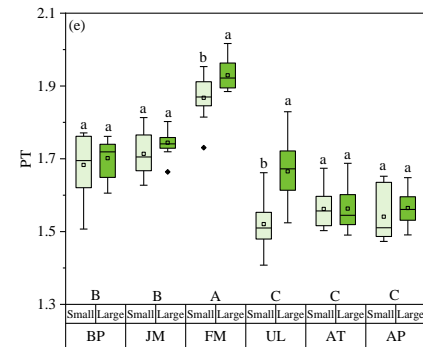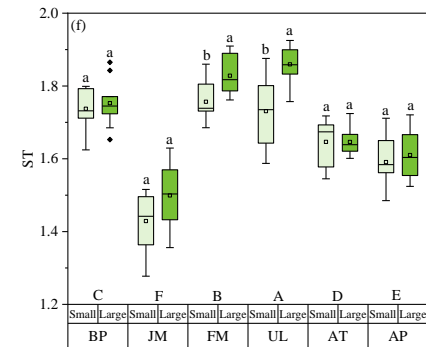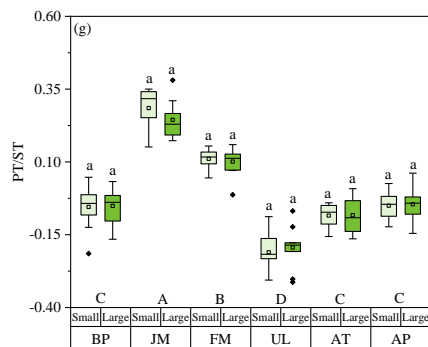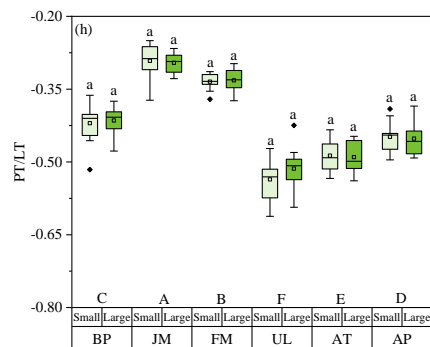

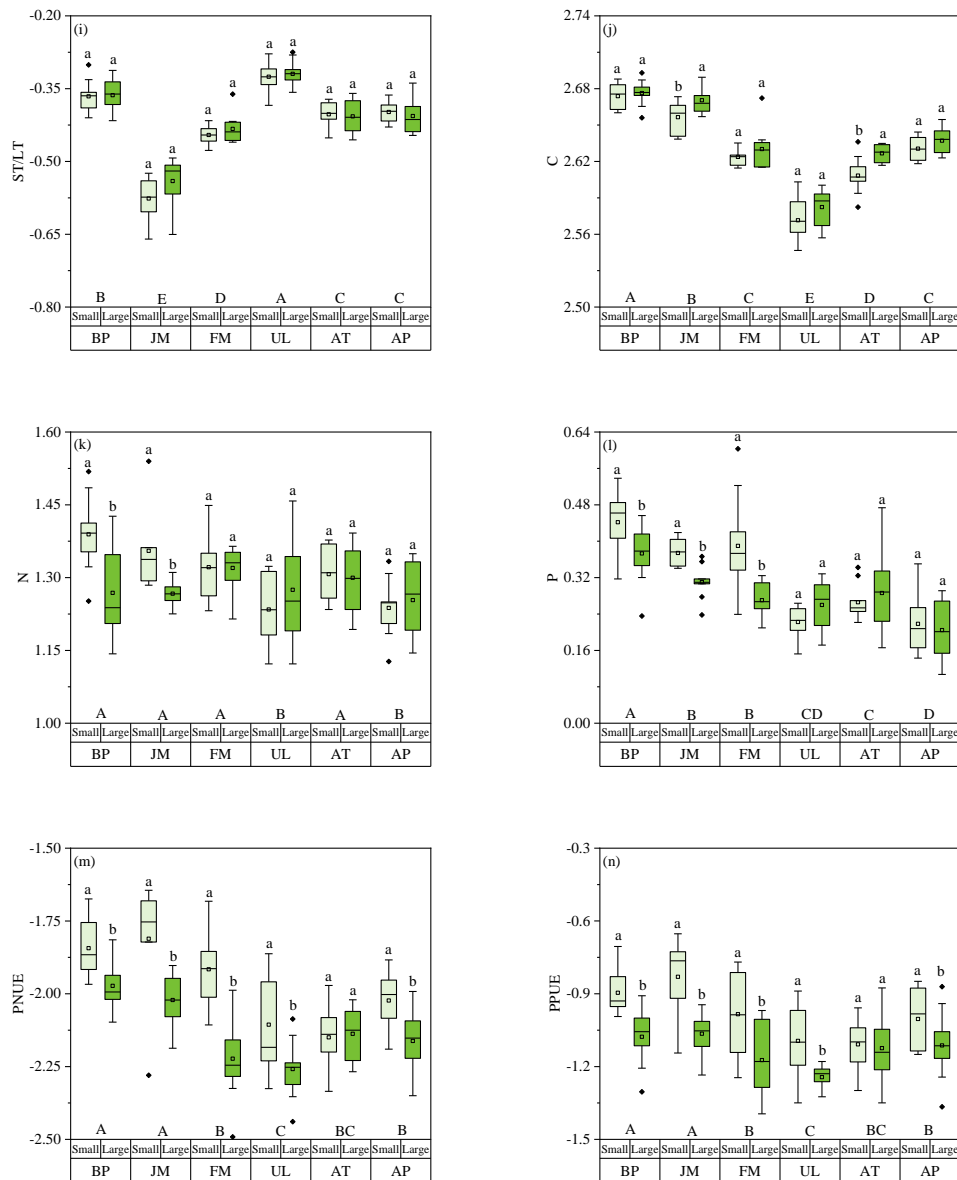

**Figure S1** Variation in leaf traits between different tree species. Different capital letters indicated significant differences in leaf traits among different tree species ( $p < 0.05$ ). Different lowercase letters indicate significant differences in leaf traits between different sizes of the same tree species ( $p < 0.05$ ). The shade tolerance of tree species increased from left to right. BP: *Betula platyphylla*; JM: *Juglans mandshurica*; FM: *Fraxinus mandschurica*; UL: *Ulmus laciniata*; AT: *Acer tegmentosum*; AP: *Acer pictum* subsp. *mono*.
